# Supplementary material for: A Systematic Review and Meta-Analysis of Hypoglycemia and Cardiovascular Events
Source: Oxford University Press journal article supplement (doi:10.2337/dc06-1789), 2007-01-26
Supplement: pg389onlineappendixsearchquoromtable.doc [file pg389onlineappendixsearchquoromtable.doc]

**Appendix 1: Quorum Statement Checklist**

| **Heading** | **Subheading/Descriptor** | **Reported (Y/N)** | **Page Number** |
| --- | --- | --- | --- |
| Title | Identified as a meta-analysis | Y | Title page |
| Abstract | Stuctured format | Y | Abstract page |
| Objective | Y | Abstract page |
| Data sources | Y | Abstract page |
| Review methods | Y | Abstract page |
| Results | Y | Abstract page |
| Conclusion | Y | Abstract page |
| Introduction |  | Y | 1-2 |
| Methods | Searching | Y | 2-3 |
| Study selection | Y | 3 |
| Validity assessment | Y | 4, Table A |
| Data abstraction | Y | 4 |
| Study characteristics | Y | 4 |
| Quantitative data synthesis | Y | 5 |
| Results | Trial Flow | Y | Figure 1 |
| Study Characteristics | Y | 6, Table B |
| Quantitative Data Synthesis | Y | 7-9; Figures 2; Table 1 |
| Discussion |  | Y | 9-13 |

Appendix 2: Search Strategies for Cochrane Reviews, Medline and Embase

Database: CDSR, ACP Journal Club, DARE, CCTR

Search Strategy:

1 glyburide.mp. or exp Glibenclamide/ (393)

2 glibenclamide.mp. (410)

3 daonil.mp. (10)

4 diabeta.mp. (8)

5 euglucon$.mp. (15)

6 glybenclamide.mp. (6)

7 hb-419.mp. (8)

8 hb-420.mp. (8)

9 hb 419.mp. (8)

10 hb 420.mp. (8)

11 maninil.mp. (3)

12 micronase.mp. (9)

13 neogluconin.mp. (1)

14 azuglucon.mp. (0)

15 bastiverit.mp. (0)

16 Cyclohexylurea.mp. (0)

17 calabren.mp. (0)

18 clibenclamide.mp. (3)

19 diabasan.mp. (0)

20 duraglucon.mp. (0)

21 euclamin.mp. (1)

22 euglucan.mp. (0)

23 gliben.mp. (1)

24 glibeclamid.mp. (0)

25 glibenclamid.mp. (40)

26 gliben puren.mp. (0)

27 glibetic.mp. (0)

28 gliformin.mp. (0)

29 glimidstada.mp. (0)

30 glucomid.mp. (1)

31 glukoreduct.mp. (0)

32 glybencamidum.mp. (0)

33 glybenclamid.mp. (1)

34 glybendamine.mp. (0)

35 glybenzyclamide.mp. (0)

36 glycolande.mp. (1)

37 glycomin.mp. (1)

38 glynase.mp. (2)

39 glynase prestab.mp. (1)

40 hb419.mp. (4)

41 libanil.mp. (0)

42 lisaglucon.mp. (0)

43 melix.mp. (1)

44 miglucan.mp. (0)

45 praeciglucon.mp. (0)

46 U26452.mp. (0)

47 U 26452.mp. (0)

48 1 or 2 or 3 or 4 or 5 or 6 or 7 or 8 or 9 or 10 or 11 or 12 or 13 or 14 or 15 or 16 or 17 or 18 or 19 or 20 or 21 or 22 or 23 or 25 or 26 or 27 or 28 or 29 or 30 or 31 or 33 or 36 or 37 or 38 or 39 or 40 or 41 or 42 or 43 or 44 or 45 or 47 (575)

49 from 48 keep 3 (1)

Database: Ovid MEDLINE(R) <1966 to October Week 3 2005>

Search Strategy:

1 glyburide.mp. or exp GLYBURIDE/ (4315)

2 glibenclamide.mp. (4377)

3 daonil.mp. (38)

4 diabeta.mp. (729)

5 euglucon 5.mp. (7)

6 euglucon n.mp. (6)

7 euglucon$.mp. (20)

8 glybenclamide.mp. (262)

9 hb-419.mp. (91)

10 hb-420.mp. (7)

11 hb 419.mp. (91)

12 hb 420.mp. (7)

13 maninil.mp. (15)

14 micronase.mp. (4)

15 neogluconin.mp. (1)

16 1 or 2 or 3 or 4 or 7 or 8 or 13 or 14 (6858)

17 limit 16 to humans (2810)

18 limit 17 to english language (1779)

19 limit 18 to (clinical trial or clinical trial, phase iii or clinical trial, phase iv or controlled clinical trial or evaluation studies or multicenter study or randomized controlled trial) (420)

20 randomized controlled trial.mp. or exp Randomized Controlled Trials/ (42606)

21 exp RANDOM ALLOCATION/ or random$.mp. (343788)

22 exp Double-Blind Method/ or double-blind.mp. (94624)

23 single blind.mp. (11389)

24 clinical trials.mp. or exp Clinical Trials/ (194697)

25 triple blind.mp. (107)

26 mask$.mp. [mp=title, original title, abstract, name of substance word, subject heading word] (30765)

27 blind$.mp. [mp=title, original title, abstract, name of substance word, subject heading word] (147389)

28 placebos.mp. or exp PLACEBOS/ (23977)

29 Research Design/ (39616)

30 Comparative Study/ (1160097)

31 Evaluation Studies/ (114431)

32 Follow-Up Studies/ (292260)

33 Prospective Studies/ (181526)

34 control$.mp. [mp=title, original title, abstract, name of substance word, subject heading word] (1414842)

35 prospectiv$.mp. [mp=title, original title, abstract, name of substance word, subject heading word] (251341)

36 volunteer$.mp. [mp=title, original title, abstract, name of substance word, subject heading word] (86201)

37 20 or 21 or 22 or 23 or 24 or 25 or 26 or 27 or 28 or 29 or 30 or 31 or 32 or 33 or 34 or 35 or 36 (3119317)

38 19 and 37 (400)

39 from 38 keep 1-400 (400)

40 from 38 keep 3 (1)

Database: EMBASE <1980 to 2005 Week 42>

Search Strategy:

1 glyburide.mp. or exp Glibenclamide/ (9255)

2 glibenclamide.mp. (9560)

3 daonil.mp. (299)

4 diabeta.mp. (176)

5 euglucon$.mp. (292)

6 glybenclamide.mp. (217)

7 hb-419.mp. (26)

8 hb-420.mp. (10)

9 hb 419.mp. (26)

10 hb 420.mp. (10)

11 maninil.mp. (36)

12 micronase.mp. (182)

13 neogluconin.mp. (1)

14 azuglucon.mp. (2)

15 bastiverit.mp. (4)

16 Cyclohexylurea.mp. (10)

17 calabren.mp. (1)

18 clibenclamide.mp. (5)

19 diabasan.mp. (3)

20 duraglucon.mp. (3)

21 euclamin.mp. (3)

22 euglucan.mp. (30)

23 gliben.mp. (14)

24 glibeclamid.mp. (0)

25 glibenclamid.mp. (62)

26 gliben puren.mp. (3)

27 glibetic.mp. (3)

28 gliformin.mp. (3)

29 glimidstada.mp. (5)

30 glucomid.mp. (2)

31 glukoreduct.mp. (3)

32 glybencamidum.mp. (0)

33 glybenclamid.mp. (2)

34 glybendamine.mp. (0)

35 glybenzyclamide.mp. (0)

36 glycolande.mp. (6)

37 glycomin.mp. (3)

38 glynase.mp. (82)

39 glynase prestab.mp. (21)

40 hb419.mp. (3)

41 libanil.mp. (1)

42 lisaglucon.mp. (6)

43 melix.mp. (5)

44 miglucan.mp. (25)

45 praeciglucon.mp. (5)

46 U26452.mp. (0)

47 U 26452.mp. (1)

48 1 or 2 or 3 or 4 or 5 or 6 or 7 or 8 or 9 or 10 or 11 or 12 or 13 or 14 or 15 or 16 or 17 or 18 or 19 or 20 or 21 or 22 or 23 or 25 or 26 or 27 or 28 or 29 or 30 or 31 or 33 or 36 or 37 or 38 or 39 or 40 or 41 or 42 or 43 or 44 or 45 or 47 (9682)

49 random$.mp. (295221)

50 Randomized Controlled Trial/ (92388)

51 double blind.mp. (65242)

52 single blind.mp. (5155)

53 Clinical Trial/ (325948)

54 triple blind.mp. (88)

55 Phase 3 Clinical Trial/ (6296)

56 Phase 4 Clinical Trial/ (493)

57 mask$.mp. (24120)

58 blind$.mp. (108603)

59 placebo.mp. or exp PLACEBO/ (119366)

60 evaluation study.mp. (1045)

61 multicentre study.mp. (2907)

62 Multicenter Study/ (31350)

63 research design.mp. (4940)

64 prospective study.mp. or Prospective Study/ (77460)

65 comparative study.mp. or Comparative Study/ (79257)

66 follow up.mp. or Follow Up/ (324938)

67 Controlled Study/ (1906798)

68 48 and 67 (4333)

69 limit 68 to human (1377)

70 68 or 69 (4333)

71 limit 70 to english language (4183)

72 49 or 50 or 51 or 52 or 53 or 54 or 55 or 56 or 57 or 58 or 59 or 60 or 61 or 62 or 63 or 64 or 65 or 66 (986267)

73 72 and 71 (642)

74 from 73 keep 1-400 (400)

75 from 73 keep 400-642 (243)

76 from 73 keep 10 (1)

77 from 76 keep 1 (1)
