# Supplementary material for: A Systematic Review and Meta-Analysis of Hypoglycemia and Cardiovascular Events
Source: Oxford University Press journal article supplement (doi:10.2337/dc06-1789), 2007-01-26
Supplement: pg389onlineappendixtable1a.doc [file pg389onlineappendixtable1a.doc]

**Online Appendix 1**

Table A: Validity Assessment

| Study | Description of Randomization | Blinding* | Percent Loss to Follow Up | ITT Analysis Reported |
| --- | --- | --- | --- | --- |
| Baba 1983 | No | Yes | NS | Yes |
| Ciccarone 1999 | No | No | 0 | Yes |
| Clarke 1975 | Yes† | No | 11 | No |
| Dills 1996 | No | Yes | 15 | Yes |
| Draeger 1996 | No | Yes | 22 | Yes |
| Forst 2003 | No | No | 3 | NS |
| Haider 1976 | No | No | 32 | No |
| Hamblin 1970 | Yes | No | 7 | No |
| Harrower 1985 | No | No | 15 | No |
| Harrower 1994 | No | No | 12 | NS |
| Herz 2002 | No | No | 11 | Yes |
| Hollander 2001 | No | Yes | 5 | Yes |
| Landgraf 1999 | No | Yes | 17 | Yes |
| Mafuzy 2002 | No | No | 16 | Yes |
| Marbury 1999 | No | Yes | 37 | No |
| Roach 2001 | Yes‡ | No | 10 | Yes |
| Rosenstock 1993 | No | No | 32 | No |
| Schmitt 1989 | No | No | NS | NS |
| UKPDS 13 1995 | Yes‡ | No§ | 16 | Yes |
| UKPDS 33 1998 | Yes‡ | No§ | 16 | Yes |
| Wolffenbuttel 1999 | No | Yes | 25 | Yes |

NS – Not specified; *Yes to Blinding implies blinding of participants and caregivers; †According to the original report ‘more-or-less randomly allocated’; ‡Computer generated; §Outcome assessors and data analyzers were blinded.
