# Supplementary material for: A Systematic Review and Meta-Analysis of Hypoglycemia and Cardiovascular Events
Source: Oxford University Press journal article supplement (doi:10.2337/dc06-1789), 2007-01-26
Supplement: pg389onlineappendixtable1b.doc [file pg389onlineappendixtable1b.doc]

**Online Appendix 2**

Table B: Baseline Characteristics

| Study | n | Follow Up, m | Age: min –max, y | HbA1c % | FPG mmol/L | Diabetes Duration, m | Therapy | Complications of Diabetes | Comparison Drug | Max Daily Dose Comparison Drug, mg | Max Daily Dose Glyburide,mg | Target HbA1c, % | Target FPG, mmol/L |
| --- | --- | --- | --- | --- | --- | --- | --- | --- | --- | --- | --- | --- | --- |
| Baba 1983 | 277 | 6 | NS | NS | > 7.2 | NS | Diet or OHA | Yes | Gliclazide | 40 | 10 | NS | NS |
| Ciccarone 1999 | 43 | 4 | 40-60 | 7.8 | 10 | New onset | NS | NS | Gliquidone | 90 | 15 | NS | NS |
| Clarke 1975 | 321 | 24 | > 40 | NS | 13.8 | < 3 | Diet | NS | Chlorpropamide | 375 | 30 | NS | < 10 |
| Dills 1996 | 577 | 13 | 30-80 | 8.5 | 13 | 60 | Diet or OHA | NS | Glimiperide | 16 | 20 | NS | < 8.3 |
| Draeger 1996 | 1044 | 12 | 40-80 | 8.1 | 9 | 60 | OHA | Yes | Glimiperide | 8 | 20 | NS | < 8.3 |
| Forst 2003 | 143 | 4.5 | 39-70 | 7.6 | NS | 48 | OHA | NS | Insulin | NS | 10.5 | NS | NS |
| Haider 1976 | 107 | 6-24 | 20-80 | NS | NS | NS | NS | NS | Chlorpropamide | 500 | 15 | NS | NS |
| Hamblin 1970 | 97 | 6 | 34-89 | NS | NS | NS | Diet | NS | Chlorpropamide | 500 | NS | NS | NS |
| Harrower 1985 | 47 | 12 | 55-70 | 10-12 | NS | 24-48 | Diet | NS | Glipizide | 20 | 30 | 5.6-8.7 | NS |
| Harrower 1994 | 170 | 60 | NS | NS | NS | NS | NS | NS | Gliclazide | NS | NS | NS | NS |
| Herz, 2002 | 143 | 4 | 60-80 | 9.9 | NS | 138 | OHA | No | Insulin | NS | 20 | NS | < 7 |
| Hollander2001 | 152 | 2 | 32-75 | 8.2 | 11 | 60 | Diet | NS | Nateglinide | 360 | 10 | NS | NS |
| Landgraf 1999 | 194 | 3.5 | Mean 62 | 8 | 13 | 12 | OHA | No | Repaglinide | 12 | 10.5 | NS | 6.2 - 7.8 |
| Mafuzy 2002* | 235 | 1 | 52-55 | 7.8 | 9.0 | 84 | OHA | NS | Repaglinide | NS | NS | NS | NS |
| Marbury 1998 | 576 | 12 | 37-75 | 8.8 | 11.3 | 84 | OHA | Yes | Repaglinide | 12 | 15 | NS | 4.4  - 7.8 |
| Roach 2001 | 172 | 4 | > 30 | 10 | NS | > 3 | OHA | NS | Insulin | NS | 15 | NS | < 7.0 |
| Rosenstock 1993 | 139 | 4 | > 65 | NS | 16.7 | 132 | OHA | NS | Glipizide | 40 | 20 | NS | < 8.9 |
| Schmitt 1989 | 40 | 6 | NS | NS | NS | NS | NS | NS | Glipizide | NS | NS | NS | NS |
| UKPDS 13, 1995 | 918 | 12 | 25-65 | 7.2 | 8.3 | 0 | Diet | Yes | Chlorpropamide | 500 | 20 | NS | < 6 |
| UKPDS 33, 1998 | 2145 | 120 | 25-65 | 6.2 | 8.0 | New onset | None | Yes | Insulin | NS | 20 | NS | < 6 |
| Chlorpropamide | 500 | 20 | < 6 |
| Wolffenbuttel 1998 | 425 | 12 | 40-75 | 7.0 | 10.8 | 72 | OHA | NS | Repaglinide | 12 | 10.5 | < 6.5 | 4.4  - 6.1 |

Min – minimum; Max – maximum; m – months; y – years; FPG - fasting plasma glucose; NS - not specified; OHA - oral hypoglycemic agents; F – females; *participants were practicing the Ramadan fast.
